# Supplementary material
Source: publisher site journal article supplement (https://www.dovepress.com/article/409883)
Supplement: Supplementary file 1 [file get_supplementary_file.php]

**Supplementary A.** Spirometry and polysomnography (PSG) parameters overview for patients by presence of obstructive sleep apnoea (OSA).

| **Polysomnography data** | **Unit/category** | **OSA (n=221)** | **No OSA (n=27)** | **p-value** |
| --- | --- | --- | --- | --- |
| **Spirometry parameters** | | | | |
| **FVC** | LLN | 2.89 (2.44, 3.51) | 2.81 (2.49, 3.05) | 0.437 |
| Pre-BD (L) | 2.72 (2.15, 3.63) | 2.91 (2.04, 3.29) | 0.767 |
| Pre-BD (%) | 0.78 (0.64, 0.89) | 0.85 (0.62, 0.93) | 0.362 |
| Post-BD (L) | 2.79 (2.18, 3.64) | 2.93 (2.1, 3.38) | 0.965 |
| Post-BD (%) | 0.79 (0.65, 0.9) | 0.88 (0.65, 0.97) | 0.175 |
| **FEV** | LLN | 2.28 (1.92, 2.83) | 2.31 (1.98, 2.44) | 0.639 |
| Pre-BD (L) | 2.17 (1.54, 2.94) | 2.48 (1.65, 2.73) | 0.888 |
| Pre-BD (%) | 0.76 (0.6, 0.9) | 0.84 (0.69, 0.94) | 0.314 |
| Post-BD (L) | 2.23 (1.65, 2.99) | 2.46 (1.75, 2.84) | 0.634 |
| Post-BD (%) | 0.8 (0.61, 0.92) | 0.9 (0.66, 0.98) | 0.107 |
| **FEV/FVC** | LLN | 0.71 (0.69, 0.73) | 0.72 (0.71, 0.73) | 0.037* |
| Pre-BD (absolute) | 0.79 (0.74, 0.83) | 0.81 (0.76, 0.85) | 0.206 |
| Post-BD (absolute) | 0.81 (0.75, 0.85) | 0.83 (0.8, 0.88) | 0.047* |
| **BDR** | Yes | 20 (9%) | 5 (19%) | 0.165 |
| **Impairment** | Restrictive | 88 (40%) | 7 (26%) | 0.384 |
| Obstructive | 6 (3%) | 1 (4%) |
| Mixed | 22 (10%) | 2 (7%) |
| Normal | 105 (48%) | 17 (63%) |
| **PSG parameters** | | | | |
| **Sleep data** | Sleep latency | 15.3 (4.25, 36.25) | 9.5 (2, 33.5) | 0.333 |
| REM latency | 122.75 (75, 186.5) | 116 (62, 160) | 0.529 |
| Wake after sleep onset | 66.5 (38.2, 129) | 44.5 (21.5, 78) | 0.016* |
| Sleep efficiency | 80.2 (68.7, 89.1) | 86.9 (77, 93.9) | 0.009* |
| Sleep efficiency <80% | 106 (49%) | 7 (26%) | 0.025* |
| Total sleep time | 387.75 (336.25, 459.75) | 410 (382, 485.5) | 0.036* |
| **Architecture** | N1 (%) | 11.8 (6.6, 20.1) | 7.65 (5.4, 12.3) | 0.013* |
| N2 (%) | 58.8 (51.2, 67.5) | 55.3 (48.4, 67.5) | 0.859 |
| N3 (%) | 6.7 (0.2, 13.35) | 12.35 (4.2, 18.4) | 0.025* |
| REM (%) | 16.5 (9.9, 21.6) | 18.8 (11.6, 24.1) | 0.209 |
| **Arousals** | Respiratory arousal index | 13 (4.8, 28.4) | 1.1 (0.5, 3.6) | <0.001* |
| Spontaneous arousal index | 3.1 (1.1, 5.8) | 3.5 (2.3, 8.1) | 0.172 |
| Total arousal index | 25.9 (14.9, 38.9) | 11.7 (6, 20.6) | <0.001* |
| **Apnoea-hypopnea index** | Total | 31.5 (14.7, 61.9) | 2.2 (1.2, 3) | <0.001* |
| NREM | 26.4 (10.8, 60.4) | 1.7 (1.3, 2.7) | <0.001* |
| REM | 41.5 (21.3, 70) | 3.5 (1.7, 9.1) | <0.001* |
| **Obstructive sleep apnoea** | Yes | 221 (100%) | . | - |
| Mild | 57 (26%) | . | - |
| Moderate | 51 (23%) | . |
| Severe | 113 (51%) | . |
| **Oxygen saturation** | Total | 94 (92, 96) | 96 (94, 97) | <0.001* |
| Wake | 95 (93, 96) | 96 (95, 97) | 0.004* |
| NREM | 93 (91, 95) | 96 (95, 97) | <0.001* |
| REM | 93 (89, 95) | 97 (96, 98) | <0.001* |
| Nadir | 80 (70, 85) | 90 (87, 91) | <0.001* |
| **Continuous positive**  **airway pressure (CPAP)** | Trialled CPAP | 133 (60%) | - |  |
| CPAP > 30 days | 78 (59%) | - |  |
| Days used (%) | 30.4 (10.0, 91.1) | - |  |
| Average hours used | 4.85 (3.1, 7.0) | - |  |
| Days used >4 hours (%) | 21.6 (3.3, 76.7) | - |  |
| Adherent | 23 (30%) | - |  |
| Data displayed as median (interquartile range) or number (%)  p-values obtained via Kruskal-Wallis rank sum test for continuous parameters, and chi-squared test for categorical parameters (utilising Fishers exact test in cases where cell counts were <10)  **Abbreviations**: **BD**, bronchodilator; **BDR**, BD responsiveness; **FEV1**, Forced expiratory volume in one second; **FVC**, Forced vital capacity; **LLN**, Lower limit of normal; **N1/N2/N3**, non-rapid eye movement stages 1, 2, 3; **REM,** Rapid eye movement.  * Indicates significance at p<0.05 | | | | |

**Supplementary B.** Clinical and demographic details of patients by spirometry impairment

| **Clinical parameters** | **Unit/Category** | **No impairment (n=121)** | **Restrictive impairment (n=95)** | **Obstructive /mixed impairments (n=31)** | **p-value** |
| --- | --- | --- | --- | --- | --- |
| **Sex** | Female | 62 (51%) | 45 (47%) | 12 (39%) | 0.491 |
| **Age (first contact)** | Year | 47.34 (39.48, 56.75) | 49.08 (37.67, 58.28) | 46.44 (39.7, 52.74) | 0.511 |
| **Height** | cm | 168.5 (161, 176) | 166 (161, 173) | 167 (161.5, 171) | 0.411 |
| **Weight** | kg | 97 (87, 112.3) | 99 (86, 113.7) | 90 (81, 119) | 0.520 |
| **Neck circumference** | cm | 41 (38, 44.5) | 44 (41, 48) | 44 (39, 45.75) | 0.001* |
| **Body mass index** | kg/m2 | 34.14 (30.67, 39.12) | 35.71 (30.46, 40.35) | 32.74 (28.92, 39.43) | 0.390 |
| **Corpulence status** | Underweight | 0 (0%) | 0 (0%) | 0 (0%) | 0.382 |
| Normal weight | 4 (3%) | 2 (2%) | 2 (7%) |
| Overweight | 23 (19%) | 15 (16%) | 8 (27%) |
| Obese | 94 (78%) | 78 (82%) | 20 (67%) |
| **Origin** | Outer regional | 88 (72%) | 41 (43%) | 10 (32%) | <0.001* |
| Remote | 13 (11%) | 7 (7%) | 2 (6%) |
| Very remote | 21 (17%) | 47 (49%) | 19 (61%) |
| **Smoking data and status** | Had smoking info | 116 (95%) | 89 (94%) | 31 (100%) | 0.456 |
| Current smoker | 54 (46%) | 38 (42%) | 17 (55%) | 0.359 |
| Former smoker | 31 (27%) | 20 (22%) | 9 (29%) |
| Never smoker | 32 (28%) | 31 (35%) | 5 (16%) |
| **Epworth sleepiness scale** | Absolute value | 9.5 (6, 13) | 10 (7, 16) | 10 (6, 14) | 0.065 |
| **Chronic obstructive pulmonary disease** | Yes | 17 (14%) | 31 (33%) | 16 (52%) | <0.001* |
| **Time lag between PSG and spirometry** | Days | 10 (2, 63) | 54 (4, 360) | 183 (28, 789) | <0.001* |
| Data were median (interquartile range) or number (%)  p-values obtained via Kruskal-Wallis rank sum test for continuous parameters, and chi-squared test for categorical parameters (utilising Fishers exact test in cases where cell counts were <10)  **Abbreviations**: **PSG,** polysomnography.  * Indicates significance at p<0.05 | | | | | |
